# Supplementary material for: Sequential Modulation of the Equine Fecal Microbiota and Fibrolytic Capacity Following Two Consecutive Abrupt Dietary Changes and Bacterial Supplementation
Source: MDPI journal article supplement (doi:10.3390/ani11051278), 2021-04-29
Supplement: s1 [file s1]

**Table 1. Interactions with the relative abundance of bacterial taxa at genus level** (abundance in percent. of the total number of sequences). Genus mean relative abundances are greater than 0.1% of the total relative abundance in all the fecal samples.

| Interactions on genera                       | D0      | D2    | D7      | D14    | D21    | D28    | D56    | Mean | SD   | P-Value |
|----------------------------------------------|---------|-------|---------|--------|--------|--------|--------|------|------|---------|
|                                              | HF      | HS    | HF      | HF     | HF     | HF     | HF     |      |      |         |
| Group C                                      |         |       |         |        |        |        |        |      |      |         |
| <i>Ruminiclostridium</i>                     | 0.28ab  | 0.23b | 0.45a   | 0.30b  | 0.20b  | 0.35b  | 0.58a  | 0.32 | 0.22 | 0.0147  |
| <i>Ruminococcaceae</i> UCG-013               | 0.21b   | 0.15b | 0.17b   | 0.22b  | 0.15b  | 0.19b  | 0.27a  | 0.24 | 0.15 | 0.0064  |
| <i>Streptococcus</i>                         | 2.81b   | 5.84a | 2.22b   | 1.63b  | 1.83b  | 2.34b  | 1.70b  | 2.16 | 2.31 | 0.0245  |
| Group S                                      |         |       |         |        |        |        |        |      |      |         |
| <i>[Eubacterium] coprostanoligenes</i> group | 2.44bc  | 3.24a | 2.48bc  | 2.32b  | 2.06c  | 2.33c  | 2.64bc | 2.52 | 0.78 | 0.0058  |
| <i>Alloprevotella</i>                        | 0.73bc  | 0.95a | 0.62b   | 0.79b  | 0.47b  | 0.63b  | 0.58b  | 0.56 | 0.34 | 0.0479  |
| <i>Candidatus Soleaferrea</i>                | 0.33b   | 0.46a | 0.36b   | 0.23b  | 0.24b  | 0.35b  | 0.35b  | 0.35 | 0.24 | 0.0276  |
| <i>Lachnospiraceae</i> UCG-004               | 0.21b   | 0.12c | 0.29b   | 0.25bc | 0.28b  | 0.23ab | 0.32a  | 0.27 | 0.16 | 0.0238  |
| <i>Rikenellaceae</i> RC9 gut group           | 4.7b    | 5.46a | 5.05a   | 4.08b  | 4.24b  | 4.71b  | 4.80b  | 5.18 | 1.55 | 0.0233  |
| <i>Ruminococcaceae</i> NK4A214 group         | 2.87bc  | 3.61a | 3.35b   | 2.51bc | 2.59bc | 2.64bc | 2.81c  | 3.21 | 1.37 | 0.0032  |
| <i>Ruminococcaceae</i> UCG-002               | 1.23b   | 2.6a  | 1.36b   | 1.03b  | 1.08b  | 1.05b  | 1.04b  | 1.43 | 0.87 | 0.0054  |
| <i>Ruminococcaceae</i> UCG-010               | 2.24abc | 2.83a | 2.38abc | 1.97b  | 1.87c  | 2.12bc | 2.78bc | 2.45 | 0.94 | 0.0261  |

For each line, means with different superscripts differ at  $P < 0.05$ .

**Table 2. Effect time on the relative abundance of bacterial taxa at (A) phylum, (B) family and (C) genus levels** (abundance in percent of the total number of sequences). Genus mean relative abundances are greater than 0.1% of the total relative abundance in all the fecal samples.

| Effect of Days                | D0      | D2      | D7      | D14     | D21     | D28      | D56     | Mean  | S.D. | P-Value |
|-------------------------------|---------|---------|---------|---------|---------|----------|---------|-------|------|---------|
|                               | HF      | HS      | HF      | HF      | HF      | HF       | HF      |       |      |         |
| (A) Phylum                    |         |         |         |         |         |          |         |       |      |         |
| Firmicutes                    | 52.43bc | 55.21a  | 54.54ab | 52.54bc | 52.28bc | 53.32abc | 51.26c  | 53.08 | 3.81 | 0.0254  |
| Proteobacteria                | 0.83b   | 1.91a   | 0.86b   | 0.81b   | 0.70b   | 0.68b    | 0.85b   | 0.95  | 0.83 | 0.0030  |
| Spirochaetes                  | 5.44ab  | 3.46c   | 4.65b   | 5.54ab  | 5.64ab  | 5.98a    | 4.88b   | 5.07  | 2.09 | 0.0003  |
| (B) Family                    |         |         |         |         |         |          |         |       |      |         |
| BacteroidalesRF16group        | 0.83bc  | 0.78c   | 1.04b   | 0.72c   | 0.88bc  | 0.83bc   | 1.30a   | 0.91  | 0.36 | 0.0002  |
| Christensenellaceae           | 3.33abc | 3.77a   | 3.72ab  | 3.10c   | 3.25bc  | 3.31abc  | 2.97c   | 3.35  | 0.82 | 0.0145  |
| CoriobacterialesIncertaeSedis | 0.11ab  | 0.10abc | 0.12a   | 0.11ab  | 0.07c   | 0.10bc   | 0.10abc | 0.10  | 0.05 | 0.0276  |
| Lachnospiraceae               | 24.63b  | 20.86c  | 27.13a  | 26.59ab | 27.25a  | 25.51abc | 24.96ab | 25.27 | 4.06 | <0.0001 |
| Muribaculaceae                | 0.52b   | 1.09a   | 0.42b   | 0.47b   | 0.41b   | 0.47b    | 0.63b   | 0.57  | 0.51 | 0.0035  |
| Spirochaetaceae               | 5.28ab  | 3.34c   | 4.49b   | 5.45ab  | 5.48ab  | 5.95a    | 4.71b   | 4.94  | 2.11 | 0.0002  |
| Succinivibrionaceae           | 0.08b   | 1.71a   | 0.06b   | 0.08b   | 0.14b   | 0.05b    | 0.09b   | 0.28  | 0.77 | 0.0001  |
| (C) Genus                     |         |         |         |         |         |          |         |       |      |         |
| [Eubacterium]nodatumgroup     | 0.13ab  | 0.13ab  | 0.10abc | 0.10abc | 0.07c   | 0.14a    | 0.09bc  | 0.23  | 0.06 | 0.0244  |
| [Eubacterium]ruminantiumgroup | 0.41bc  | 0.25d   | 0.35bcd | 0.32cd  | 0.57a   | 0.48ab   | 0.44abc | 0.40  | 0.23 | 0.0017  |
| Agathobacter                  | 1.02b   | 0.77c   | 1.17ab  | 1.24a   | 1.05b   | 1.07b    | 0.99b   | 1.04  | 0.30 | 0.0003  |
| Blautia                       | 0.46bc  | 0.36c   | 0.60a   | 0.50ab  | 0.47ab  | 0.48bc   | 0.39bc  | 0.46  | 0.22 | 0.0061  |

|                                     |                      |                    |                     |                    |                     |                     |                     |             |             |        |
|-------------------------------------|----------------------|--------------------|---------------------|--------------------|---------------------|---------------------|---------------------|-------------|-------------|--------|
| <i>Celulosilyticum</i>              | 0.12 <sup>bc</sup>   | 0.18 <sup>ab</sup> | 0.13 <sup>bc</sup>  | 0.16 <sup>b</sup>  | 0.13 <sup>bc</sup>  | 0.09 <sup>c</sup>   | 0.23 <sup>a</sup>   | <b>0.15</b> | <b>0.10</b> | 0.0016 |
| <i>Christensenellaceae</i> R-7group | 3.30 <sup>abc</sup>  | 3.73 <sup>a</sup>  | 3.68 <sup>ab</sup>  | 3.06 <sup>c</sup>  | 3.22 <sup>bc</sup>  | 3.25 <sup>abc</sup> | 2.94 <sup>c</sup>   | <b>3.32</b> | <b>0.82</b> | 0.0145 |
| FamilyXIIIAD3011group               | 0.27 <sup>bcd</sup>  | 0.34 <sup>ab</sup> | 0.31 <sup>abc</sup> | 0.26 <sup>cd</sup> | 0.22 <sup>d</sup>   | 0.37 <sup>a</sup>   | 0.26 <sup>cd</sup>  | <b>0.29</b> | <b>0.10</b> | 0.0029 |
| <i>Lachnospiraceae</i> ND3007group  | 0.37 <sup>a</sup>    | 0.24 <sup>c</sup>  | 0.27 <sup>bc</sup>  | 0.27 <sup>bc</sup> | 0.26 <sup>bc</sup>  | 0.35 <sup>ab</sup>  | 0.28 <sup>bc</sup>  | <b>0.29</b> | <b>0.14</b> | 0.0237 |
| <i>Lachnospiraceae</i> NK4A136group | 3.98 <sup>a</sup>    | 2.98 <sup>b</sup>  | 3.73 <sup>a</sup>   | 4.26 <sup>a</sup>  | 4.17 <sup>a</sup>   | 3.66 <sup>ab</sup>  | 4.03 <sup>a</sup>   | <b>3.85</b> | <b>1.23</b> | 0.0202 |
| <i>Lachnospiraceae</i> UCG-002      | 0.11 <sup>abc</sup>  | 0.10 <sup>bc</sup> | 0.14 <sup>a</sup>   | 0.12 <sup>ab</sup> | 0.12 <sup>ab</sup>  | 0.09 <sup>c</sup>   | 0.11 <sup>bc</sup>  | <b>0.11</b> | <b>0.05</b> | 0.0345 |
| <i>Lachnospiraceae</i> UCG-008      | 0.52 <sup>a</sup>    | 0.40 <sup>b</sup>  | 0.58 <sup>a</sup>   | 0.54 <sup>a</sup>  | 0.53 <sup>a</sup>   | 0.60 <sup>a</sup>   | 0.52 <sup>a</sup>   | <b>0.53</b> | <b>0.16</b> | 0.0220 |
| <i>Lachnospiraceae</i> UCG-009      | 2.52 <sup>abcd</sup> | 2.07 <sup>d</sup>  | 2.75 <sup>ab</sup>  | 2.84 <sup>a</sup>  | 2.57 <sup>abc</sup> | 2.23 <sup>cd</sup>  | 2.30 <sup>bcd</sup> | <b>2.48</b> | <b>0.72</b> | 0.0278 |
| <i>Prevotellaceae</i> UCG-004       | 1.49 <sup>bc</sup>   | 1.91 <sup>a</sup>  | 1.45 <sup>c</sup>   | 1.54 <sup>bc</sup> | 1.48 <sup>bc</sup>  | 1.80 <sup>ab</sup>  | 1.52 <sup>bc</sup>  | <b>1.59</b> | <b>0.48</b> | 0.0447 |
| <i>Roseburia</i>                    | 0.24 <sup>ab</sup>   | 0.12 <sup>c</sup>  | 0.22 <sup>b</sup>   | 0.23 <sup>ab</sup> | 0.30 <sup>a</sup>   | 0.28 <sup>ab</sup>  | 0.25 <sup>ab</sup>  | <b>0.23</b> | <b>0.13</b> | 0.0017 |
| <i>Ruminococcaceae</i> UCG-005      | 2.22 <sup>b</sup>    | 2.77 <sup>a</sup>  | 2.21 <sup>b</sup>   | 2.36 <sup>b</sup>  | 1.82 <sup>c</sup>   | 2.23 <sup>b</sup>   | 2.18 <sup>b</sup>   | <b>2.25</b> | <b>0.65</b> | 0.0002 |
| <i>Ruminococcaceae</i> UCG-014      | 0.44 <sup>b</sup>    | 0.76 <sup>a</sup>  | 0.36 <sup>b</sup>   | 0.42 <sup>b</sup>  | 0.38 <sup>b</sup>   | 0.50 <sup>b</sup>   | 0.45 <sup>b</sup>   | <b>0.48</b> | <b>0.26</b> | 0.0003 |
| <i>Succinivibrio</i>                | 0.10 <sup>b</sup>    | 1.35 <sup>a</sup>  | 0.06 <sup>b</sup>   | 0.11 <sup>b</sup>  | 0.12 <sup>b</sup>   | 0.07 <sup>b</sup>   | 0.12 <sup>b</sup>   | <b>0.28</b> | <b>0.78</b> | 0.0001 |
| <i>Treponema</i> 2                  | 5.24 <sup>ab</sup>   | 3.31 <sup>c</sup>  | 4.46 <sup>b</sup>   | 5.41 <sup>ab</sup> | 5.45 <sup>ab</sup>  | 5.91 <sup>a</sup>   | 4.65 <sup>b</sup>   | <b>4.89</b> | <b>2.12</b> | 0.0002 |

For each line, means with different superscripts differ at  $P < 0.05$ .

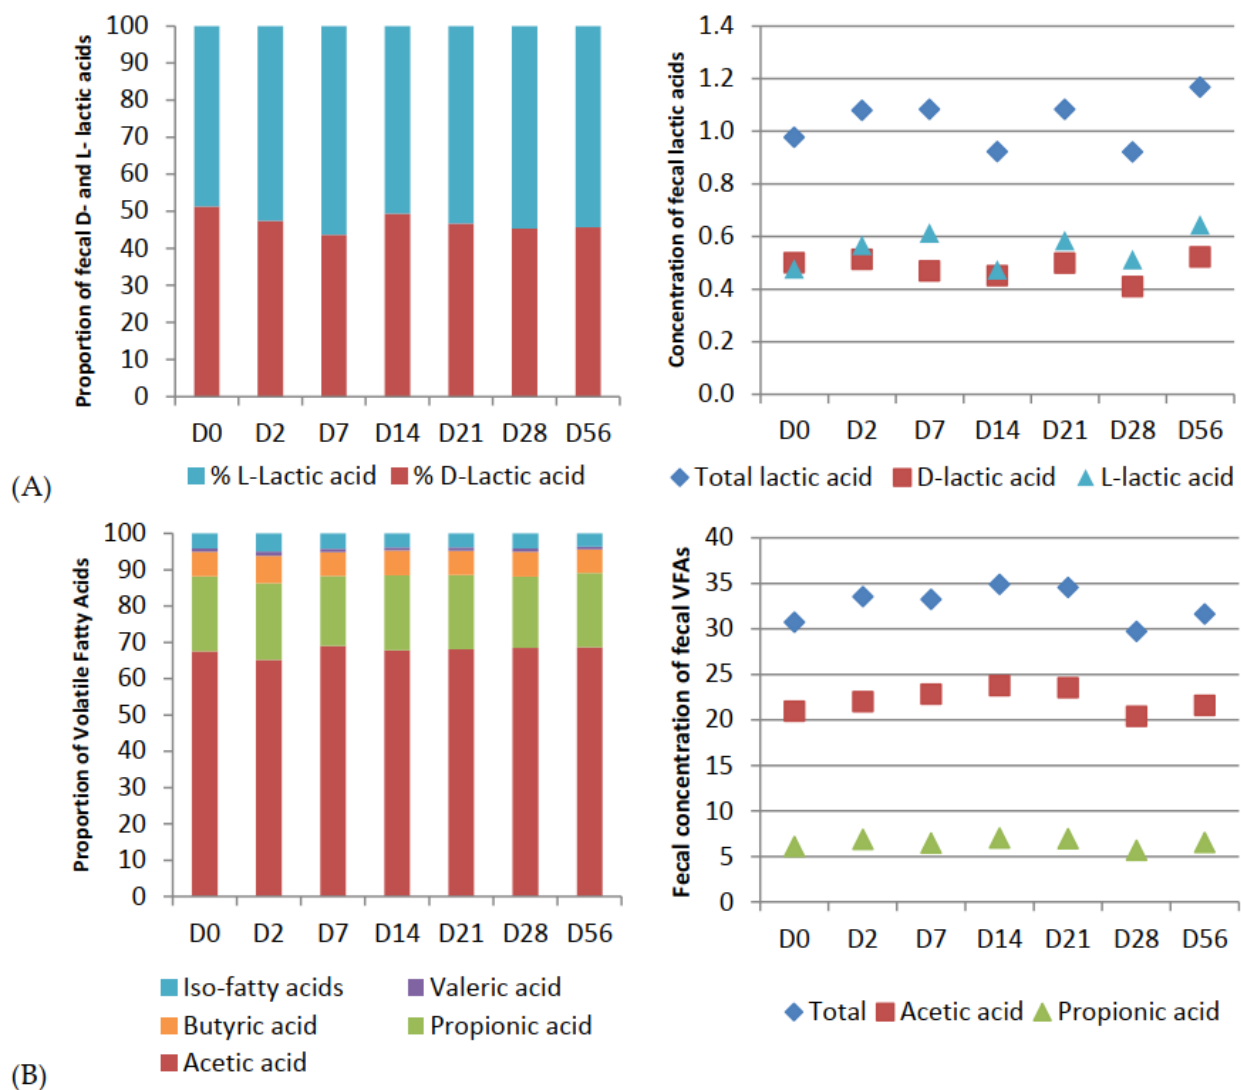

**Figure 1.** Days-related modifications of the proportions (%) and concentrations (mmol/L) of (A) 16 lactic acids and (B) volatile fatty acids.
